# Supplementary material for: An approach to compatible multiple nonlinear vibrational spectroscopy measurements using a commercial sum frequency generation system
Source: Royal Society of Chemistry journal article supplement (doi:10.1039/c1an15032d), 2011-01-01
Supplement: c1an15032d.pdf [file c1an15032d.pdf]

## Supporting Information

### An Approach to Compatible Multiple Nonlinear Vibrational Spectroscopy Measurements Using Commercial Sum Frequency Generation System

Shuji Ye,\* Feng Wei

Hefei National Laboratory for Physical Sciences at Microscale, University of Science and  
Technology of China, Hefei, Anhui, P.R.China 230026

#### The IR spectra of riboflavin

FTIR spectra were obtained using a Nicolet 8700 spectrometer. Spectra collected were averages of 32 scans at a  $1\text{ cm}^{-1}$  resolution.

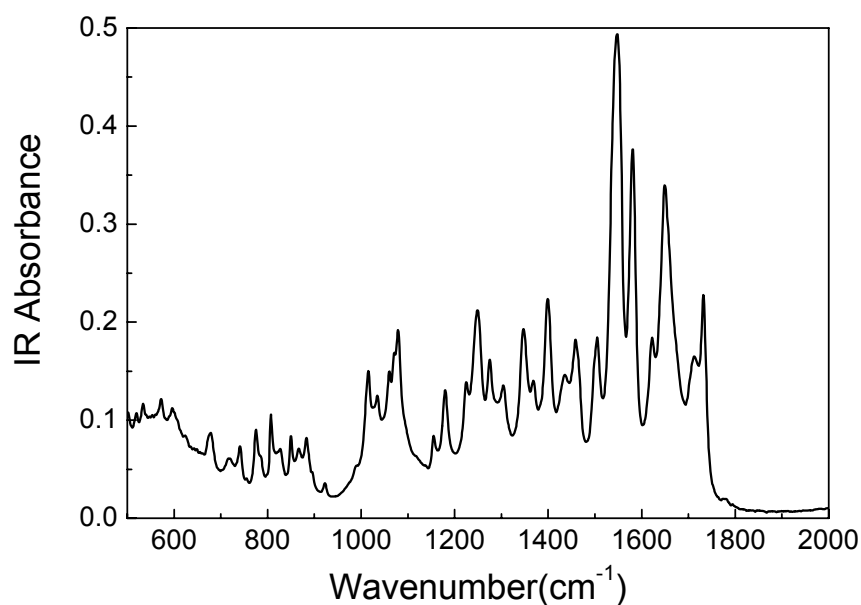

Figure S1. The IR spectra of Riboflavin

## The SFG and IIV-TPF-FWM spectra of lumichrome

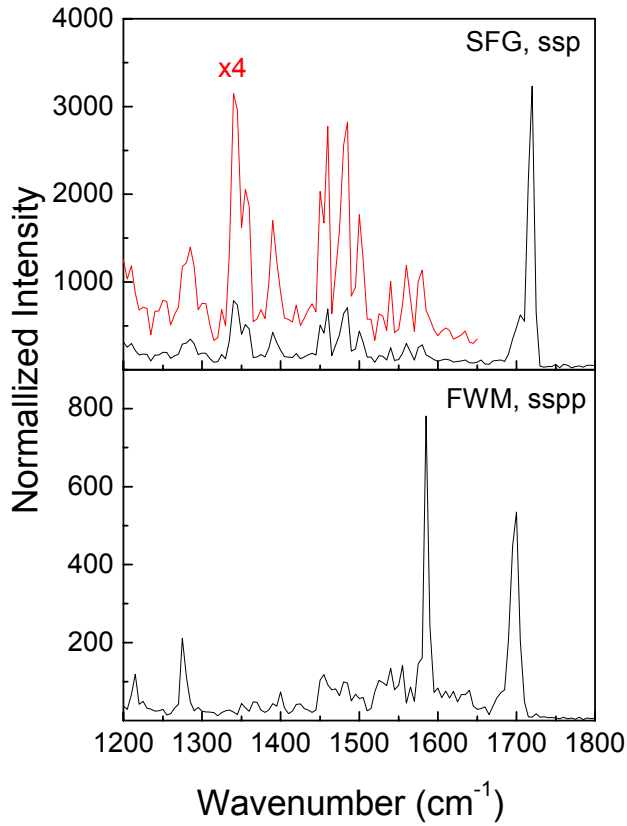

Figure S2. The SFG (ssp) and IIV-TPF-FWM (sspp) spectra of lumichrome

### The feasibility to collect DFG spectra using this compatible system

Similar to SFG, DFG is also based on a coherent second-order nonlinear process. The level schemes of the vibrational and electronic configurations involved in DFG process are shown in Figure S3. According to energy and momentum conservation,<sup>1-3</sup> DFG have the following relationships:

$$\omega_{DFG} = \omega_{vis} - \omega_{IR} \quad (S1)$$

$$\vec{k}_{DFG} = \vec{k}_{vis} - \vec{k}_{IR} \quad (S2)$$

In the case with an IR beam at  $3000 \text{ cm}^{-1}$ , DFG will emerge at the angle of  $65.31^\circ$  and the wavelength of  $633.17 \text{ nm}$  (see Figure S4). The emerging angle is close to the emerging angle of SFG ( $61.44^\circ$ ) and IIV-TPF-FWM ( $60.3^\circ$ ). Therefore DFG labview software can be modified by controlling the monochromator at  $\omega_{DFG}$  ( $\omega_{DFG} = \omega_{vis} - \omega_{IR}$ ) when scanning the IR frequency ( $\omega_{IR}$ ).

DFG spectra of riboflavin are given in Figure S5. Similar to SFG, all of the eight polarization combinations have non-vanishing signals. Accepted that the spectra intensity is different, DFG and SFG show the same peak positions. The intensity of DFG spectra is about 5-10% of the intensity of SFG spectra.

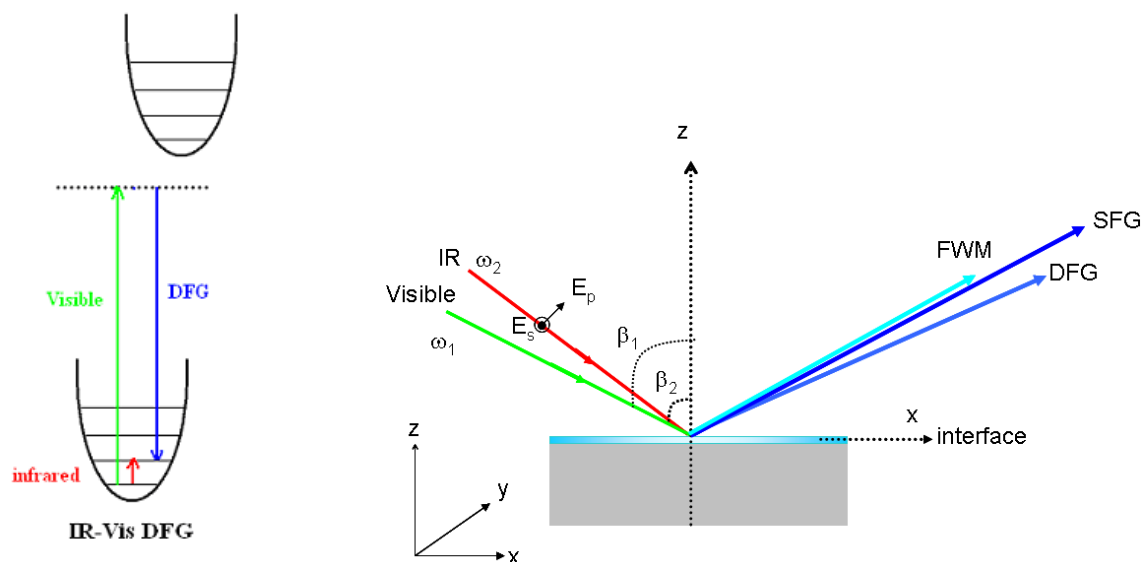

Figure S3. Level schemes of the vibrational and electronic configurations involved in DFG. Figure S3. Sketch of the visible and infrared laser beams used to generate the SFG, DFG and FWM signals on the samples.

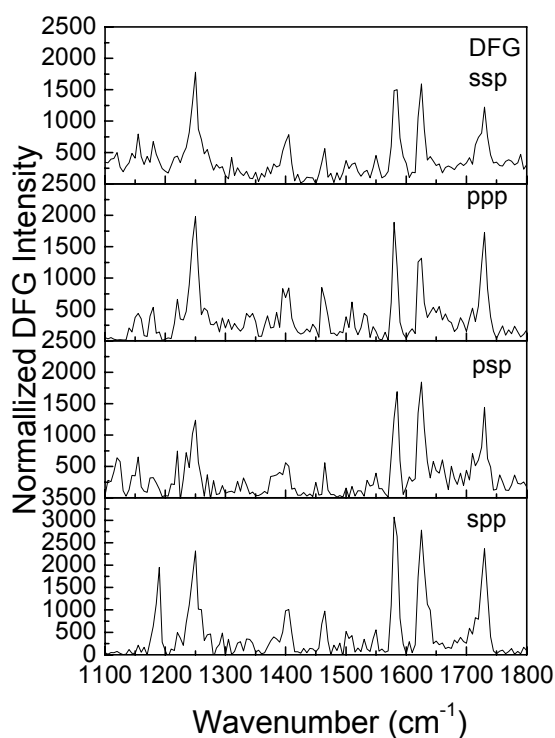

Figure S5. The DFG spectra of (-)-riboflavin.

## Reference

1. Y. R. Shen, *The Principles of Nonlinear Optics*; John Wiley & Sons: New York, 1984.
2. B. Bozzini, A. Bund, B. Busson, C. Humbert, A. Ispas, C. Mele, A. Tadjeddine, *Electrochem. Commun.*, 2010, **12**, 56–60.
3. A. Tadjeddine, A. Le Rille, O. Pluchery, F. Vidal, W. Q. Zheng, A. Peremans, *Phys. Stat. Sol. A*, 1999, **175**, 89-107.
